# Supplementary figures and images for: Characterization of Hepatitis B Virus Integrations Identified in Hepatocellular Carcinoma Genomes
Source: MDPI journal article supplement (doi:10.3390/v13020245), 2021-02-04

# HBV integrations in Sung et al. study

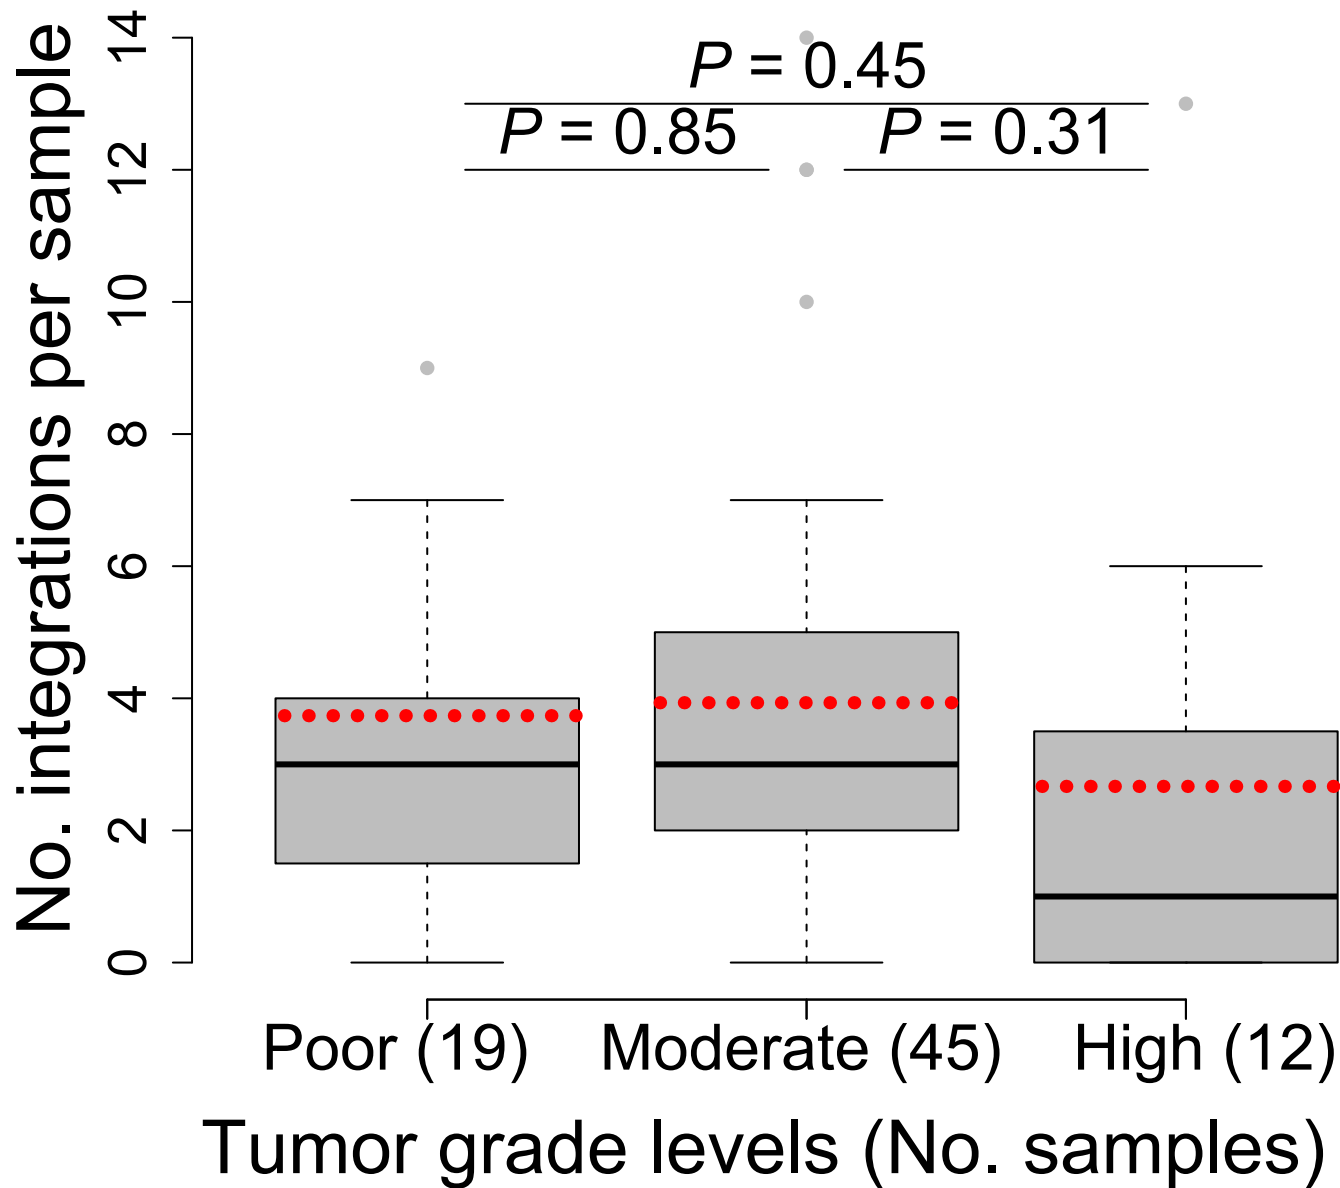

Supplement: s1 [file s1]

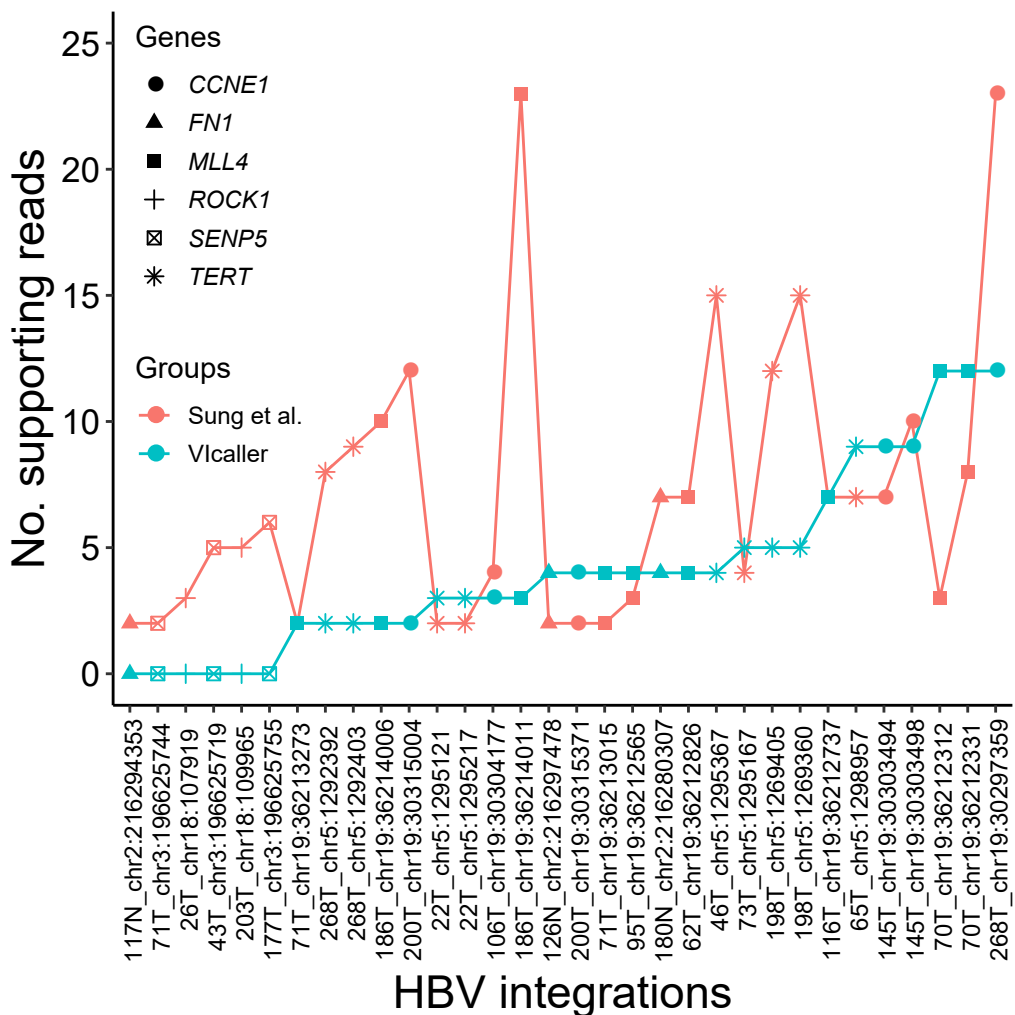

Supplement: s1 [file s1]

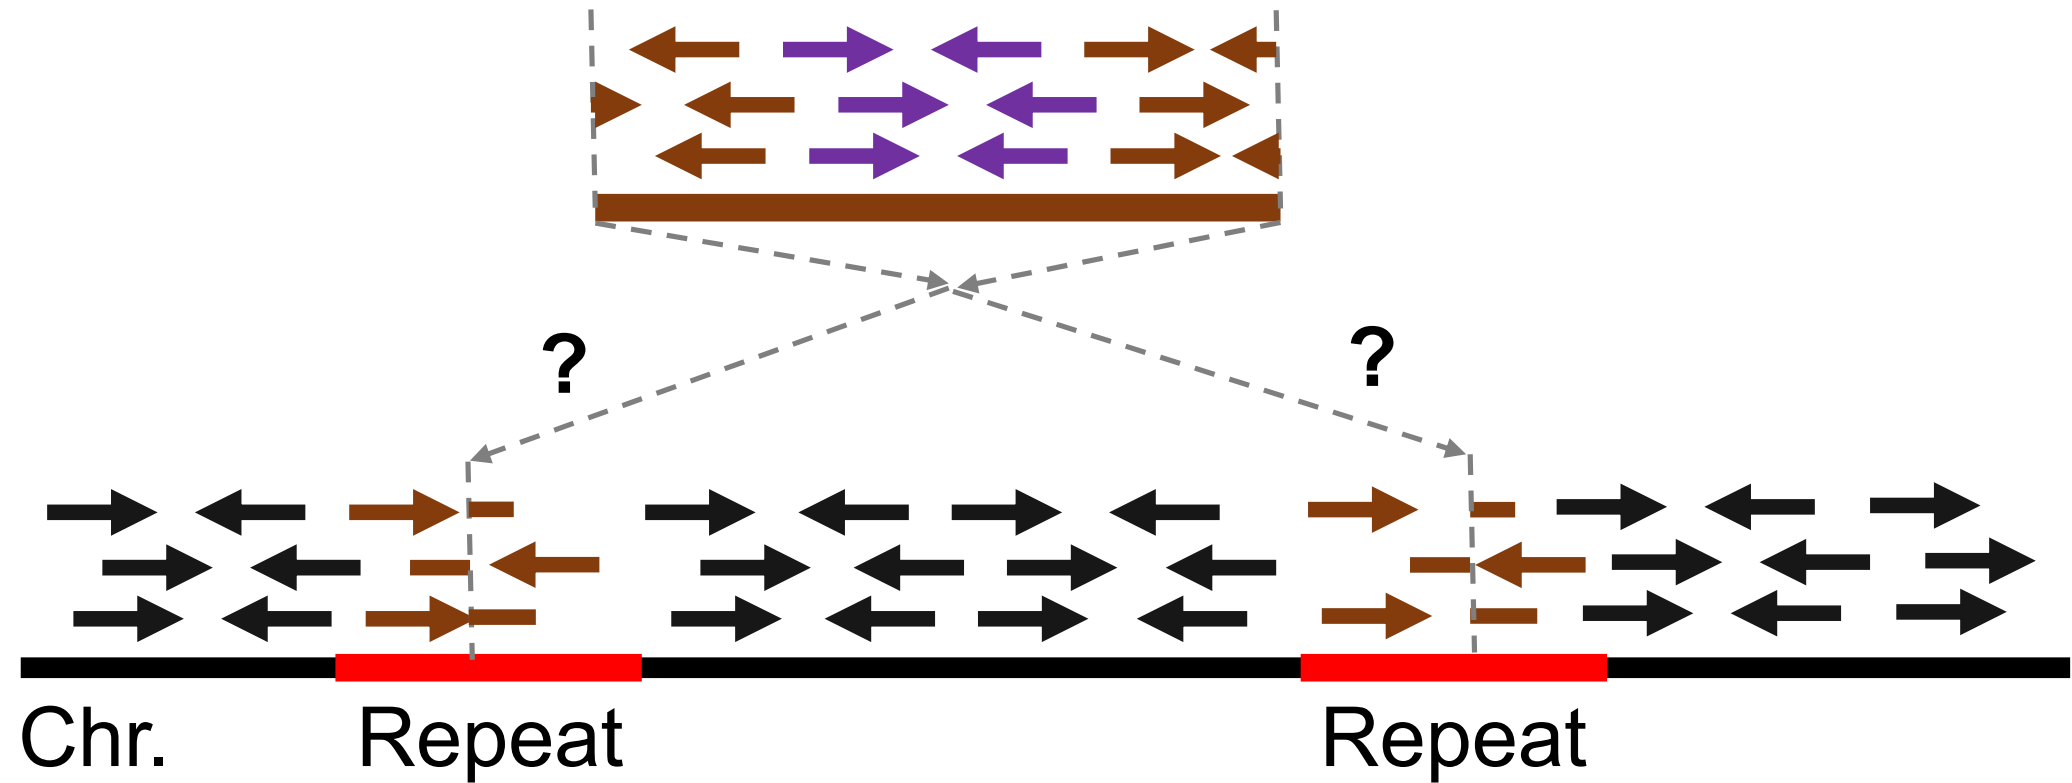

Supplement: s1 [file s1]

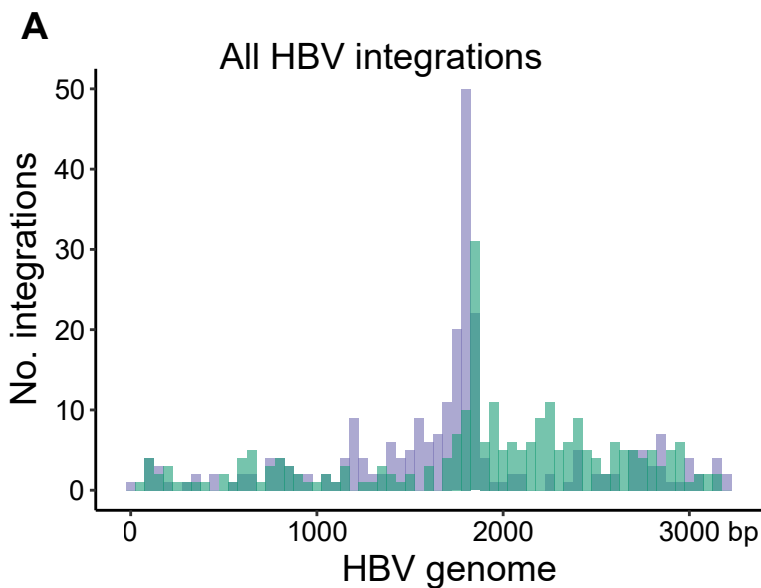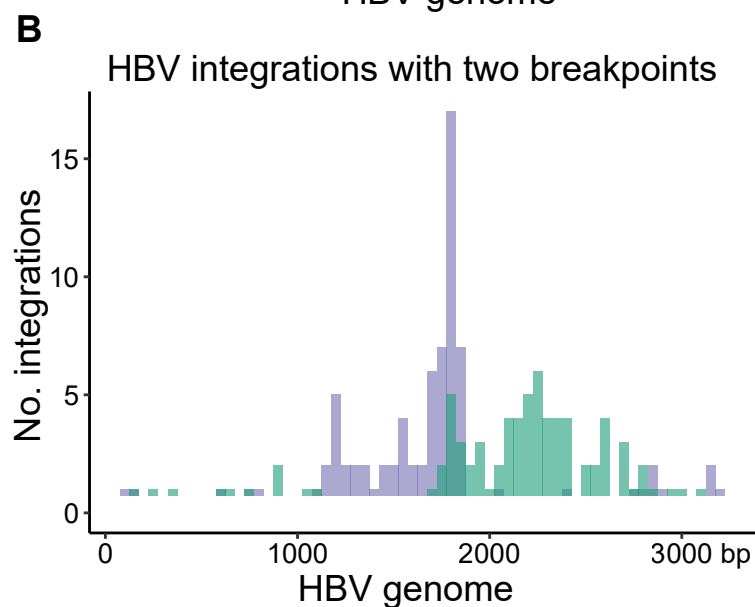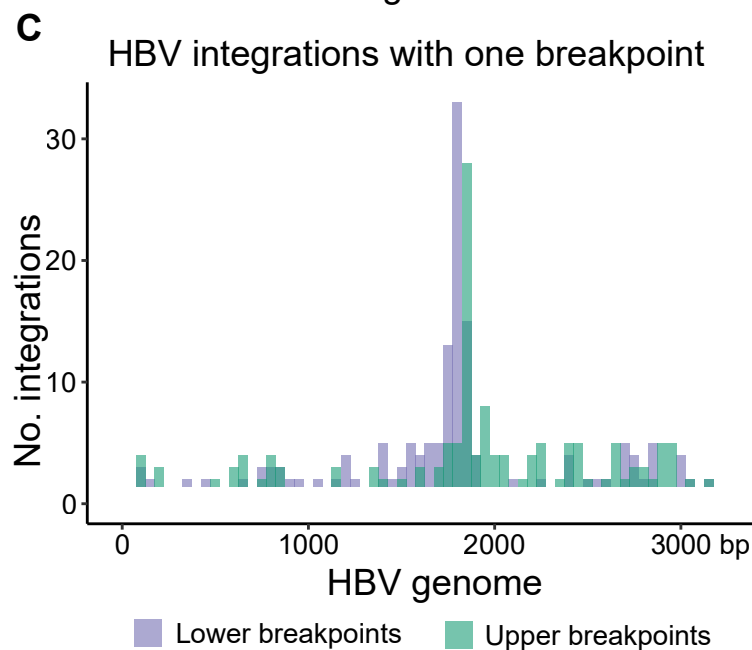

Supplement: s1 [file s1]
